# Supplementary material for: Biodegradable Nanoprobe for NIR‐II Fluorescence Image‐Guided Surgery and Enhanced Breast Cancer Radiotherapy Efficacy
Source: PubMed Central journal article supplement (PMC9036023; doi:10.1002/advs.202104728), 2022-02-16
Supplement: ADVS-9-2104728-s001.pdf [file ADVS-9-2104728-s001.pdf]

## Supporting Information

for *Adv. Sci.*, DOI 10.1002/adv.202104728

Biodegradable Nanoprobe for NIR-II Fluorescence Image-Guided Surgery and Enhanced Breast Cancer Radiotherapy Efficacy

*Rui-Qin Yang, Pei-Yuan Wang, Kang-Liang Lou, Yong-Ying Dang, Hai-Na Tian, Yang Li, Yi-Yang Gao, Wen-He Huang, Yong-Qu Zhang, Xiao-Long Liu\* and Guo-Jun Zhang\**

## Supporting Information

for *Adv. Sci.*, DOI: 10.1002/advs.202104728

### Biodegradable Nanoprobe for NIR-II Fluorescence Image-Guided Surgery and Enhanced Breast Cancer Radiotherapy Efficacy

*Rui-Qin Yang, Pei-Yuan Wang, Kang-Liang Lou, Yong-Ying Dang, Hai-Na Tian, Yang Li, Yi-Yang Gao, Wen-He Huang, Yong-Qu Zhang, Xiao-Long Liu\*, Guo-Jun Zhang\**

## Supporting Information

### Biodegradable Nanoprobe for NIR-II Fluorescence Image-Guided Surgery and Enhanced Breast Cancer Radiotherapy Efficacy

Rui-Qin Yang<sup>1,2,6</sup> ||, Pei-Yuan Wang<sup>3,4</sup> ||, Kang-Liang Lou<sup>1,2,6</sup>, Yong-Ying Dang<sup>1,2,6</sup>,  
Hai-Na Tian<sup>7</sup>, Yang Li<sup>3,4</sup>, Yi-Yang Gao<sup>1,2,6</sup>, Wen-He Huang<sup>1,2,6</sup>, Yong-Qu Zhang<sup>1,2,6</sup>,  
Xiao-Long Liu<sup>3,4\*</sup>, Guo-Jun Zhang<sup>1,2,5,6\*</sup>

1. Cancer Center & Department of Breast and Thyroid Surgery, Xiang'an Hospital of Xiamen University, School of Medicine, Xiamen University, Xiamen, Fujian, 361100, China;
2. Key Laboratory for Endocrine-Related Cancer Precision Medicine of Xiamen, Xiang'an Hospital of Xiamen University, Xiamen, Fujian, 361100, China;
3. Key Laboratory of Design and Assembly of Functional Nanostructures, Fujian Institute of Research on the Structure of Matter, Chinese Academy of Sciences, Fuzhou, Fujian, 350000, China;
4. The United Innovation of Mengchao Hepatobiliary Technology Key Laboratory of Fujian Province, Mengchao Hepatobiliary Hospital of Fujian Medical University, Fuzhou, Fujian, 350025, China;
5. Cancer Research Center, School of Medicine, Xiamen University, Xiamen, Fujian, 361100, China;
6. Xiamen Research Center of Clinical Medicine in Breast & Thyroid Cancers
7. Department of Biomaterials, College of Materials, Research Center of Biomedical Engineering of Xiamen & Key Laboratory of Biomedical Engineering of Fujian Province

& Fujian Provincial Key Laboratory for Soft Functional Materials Research, Xiamen University, Xiamen, Fujian, 361005, China.

**\*Corresponding author:** Guo-Jun Zhang, MD, PhD, Cancer Research Center and the Department of Breast-Thyroid-Surgery, Xiang'an Hospital of Xiamen University, Xiamen, Fujian, China; Email: [gjzhang@xah.xmu.edu.cn](mailto:gjzhang@xah.xmu.edu.cn), Tel: 0086-592-2889988. Xiao-Long Liu, PhD, Key Laboratory of Design and Assembly of Functional Nanostructures, Fujian Institute of Research on the Structure of Matter, Chinese Academy of Sciences, Fuzhou, Fujian, China; Email: [liuxl@fjirsm.ac.cn](mailto:liuxl@fjirsm.ac.cn), Tel: 0086-592-3594010.

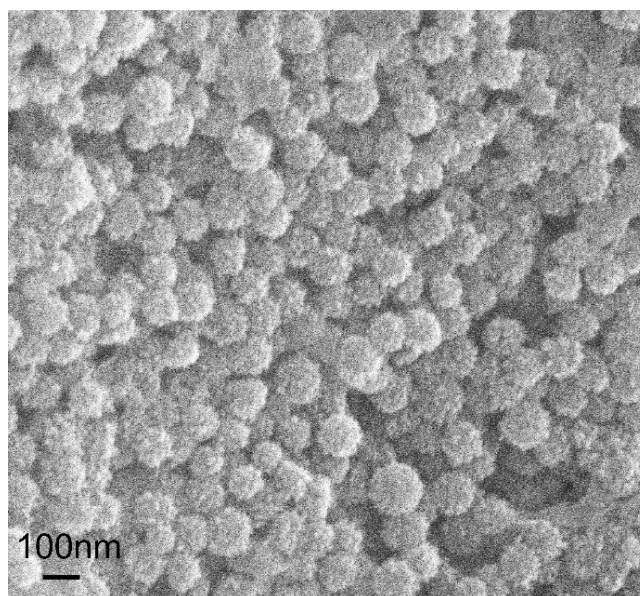

**Supplemental Figure S1.** The SEM image of R&HV-Gd@ICG.

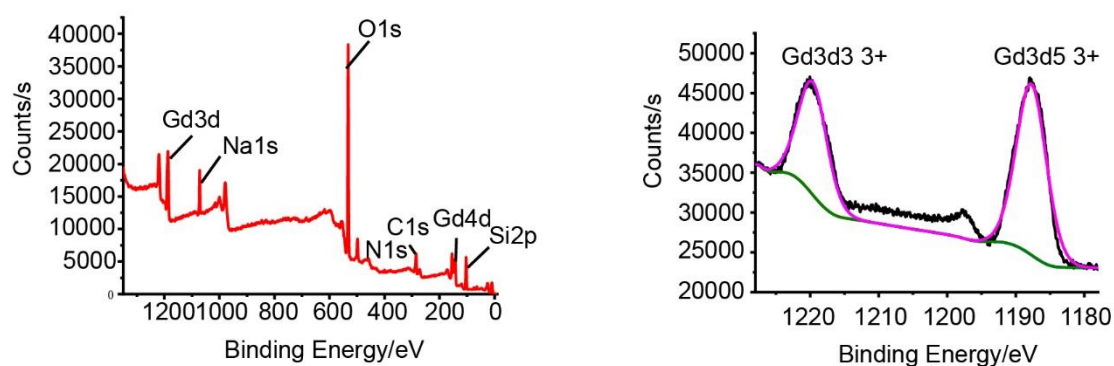

**Supplemental Figure S2.** The element analysis of HV-Gd nanoparticles by High-resolution X-ray photoelectron spectroscopy (left) and the Gd 3d<sub>3/3</sub>, Gd 3d<sub>5/3</sub> XPS patterns (right).

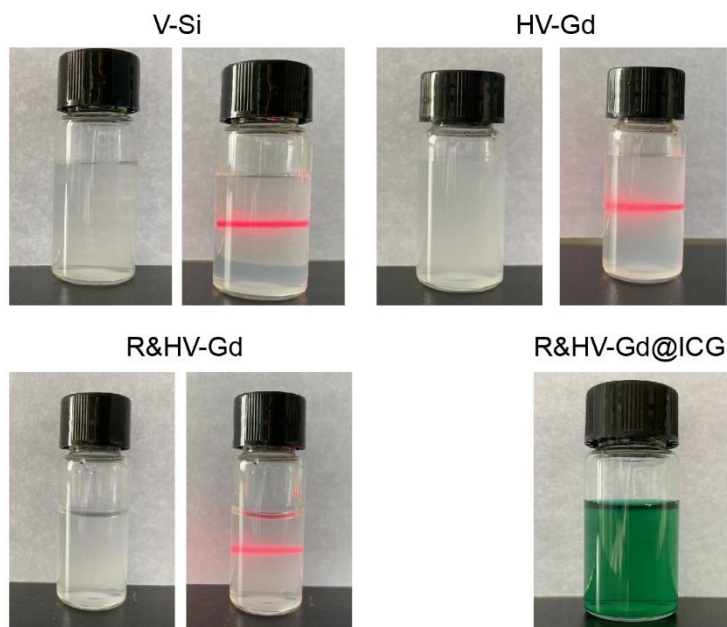

**Supplemental Figure S3.** Photographs and the tyndall effect of V-Si, HV-Gd, R&HV-Gd and R&HV-Gd@ICG, respectively.

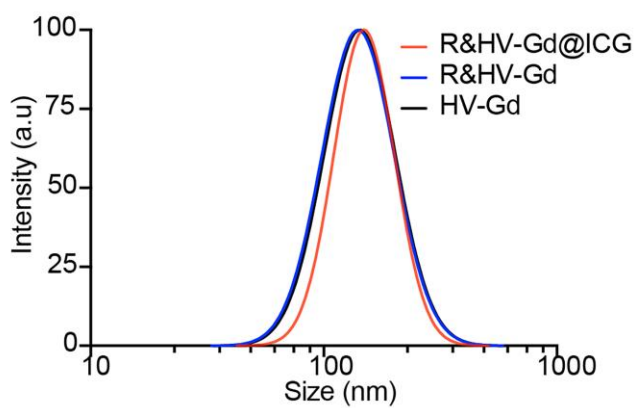

**Supplemental Figure S4.** The hydrate particle size of HV-Gd, R&HV-Gd and R&HV-Gd@ICG.

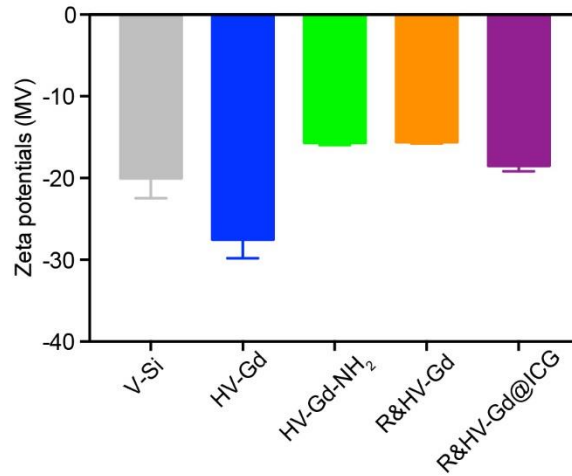

**Supplemental Figure S5.** Zeta potential data of V-Si, HV-Gd, HV-Gd-NH<sub>2</sub>, R&HV-Gd and R&HV-Gd@ICG ( $n = 3$ , data were shown as means  $\pm$  SD).

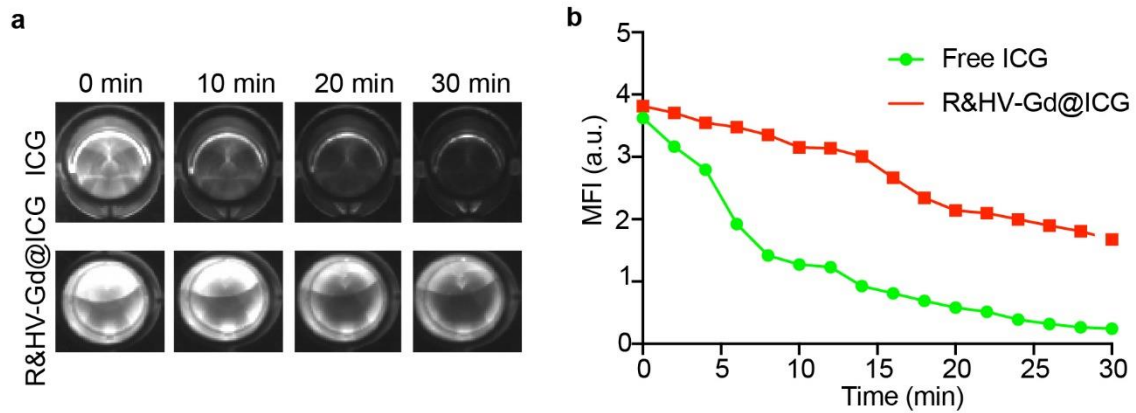

**Supplemental Figure S6.** Fluorescence images of ICG and R&HV-Gd@ICG after continuous laser irradiation for various periods (a), and quantitative analysis of the corresponding mean fluorescence intensity in panel a (b) ( $n = 3$ , data were shown as means  $\pm$  SD).

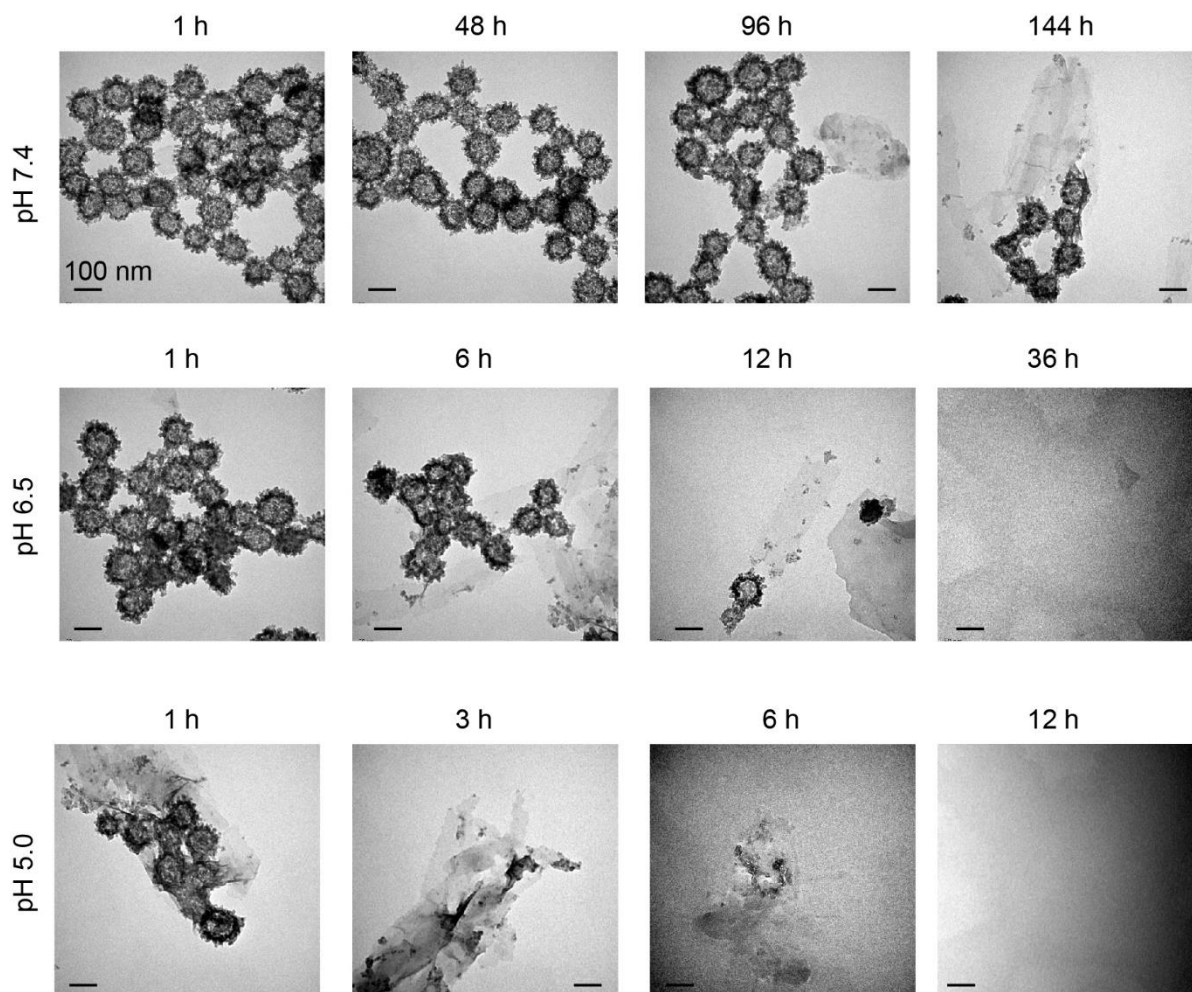

**Supplemental Figure S7.** TEM images of R&HV-Gd@ICG after incubation in buffers with different pH values (7.4, 6.5, and 5.0) for various periods.



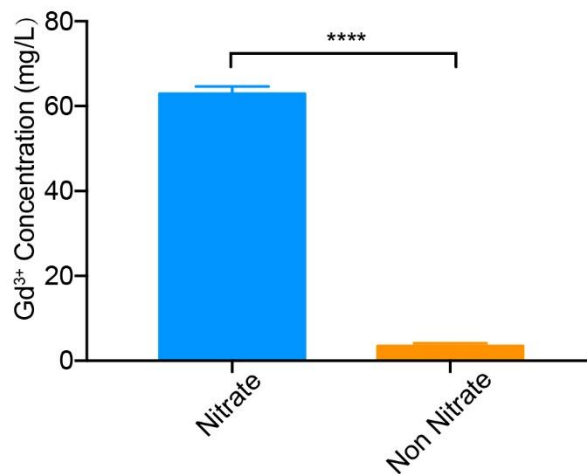

**Supplemental Figure S8.** The concentration of Gd<sup>3+</sup> in degraded R&HV-Gd@ICG solution with/without nitrification ( $n = 3$ , data were shown as means  $\pm$  SD, statistical significance is determined by two-tailed unpaired  $t$ -test, \*\*\*\* $p < 0.0001$ ).

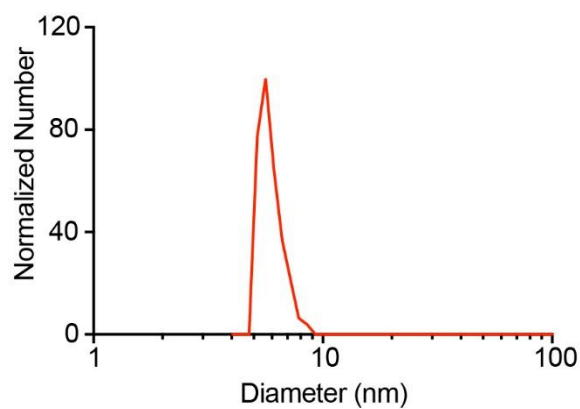

**Supplemental Figure S9.** The hydrate particle size of R&HV-Gd@ICG degraded products.

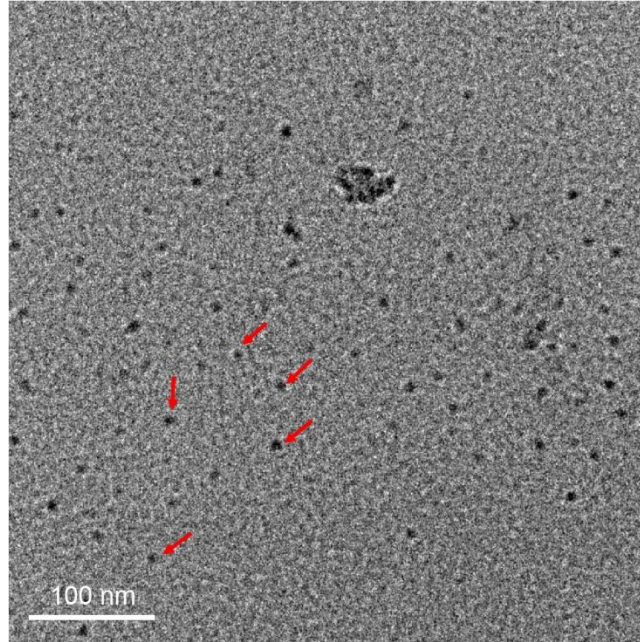

**Supplemental Figure S10.** The HRTEM image of R&HV-Gd@ICG degraded products and the red arrows represent degraded nanoparticles.

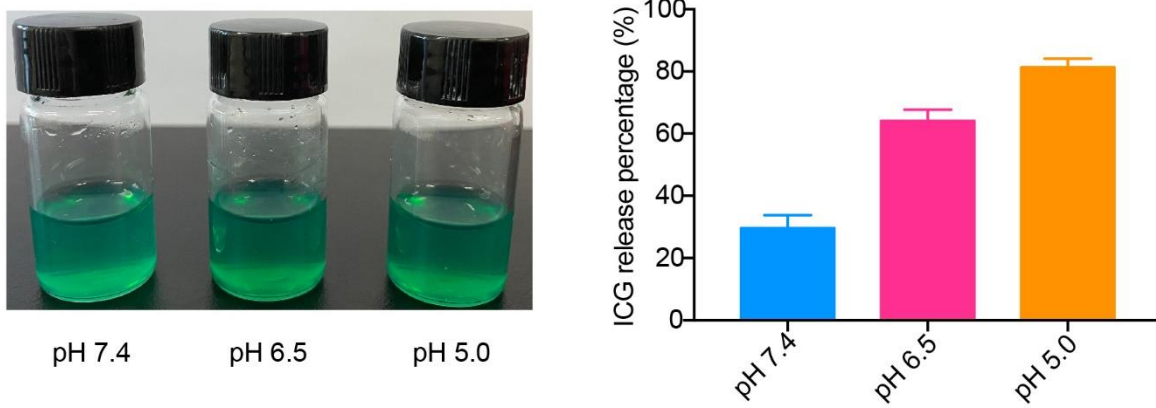

**Supplemental Figure S11.** The photographs of R&HV-Gd@ICG after 24 h incubation at different pH solutions(left), and the amount of ICG released from R&HV-Gd@ICG after 24 h incubation at different pH solutions (right) ( $n = 3$ , data were shown as means  $\pm$  SD).

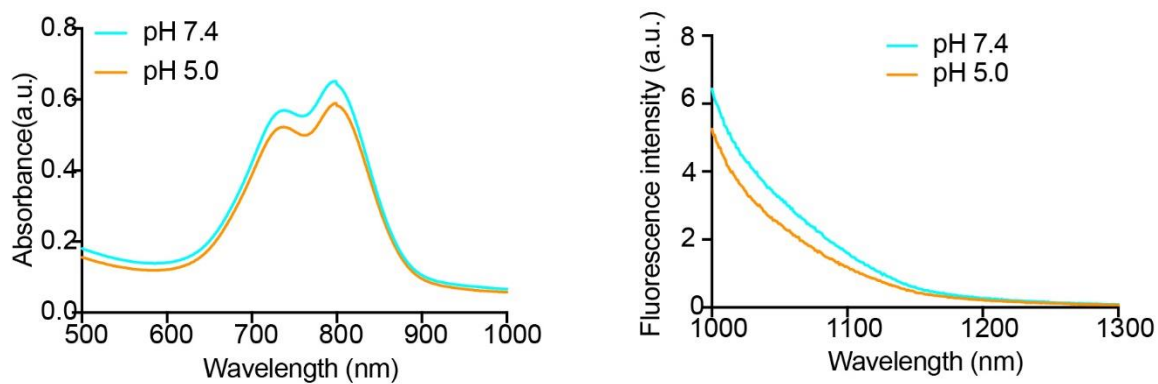

**Supplemental Figure S12.** The UV–vis–NIR absorption spectra (left) and NIR-II fluorescence emission spectra (right) of R&HV-Gd@ICG, which were incubated in pH 5.5 and 7.4 solutions for 24 hours, respectively.

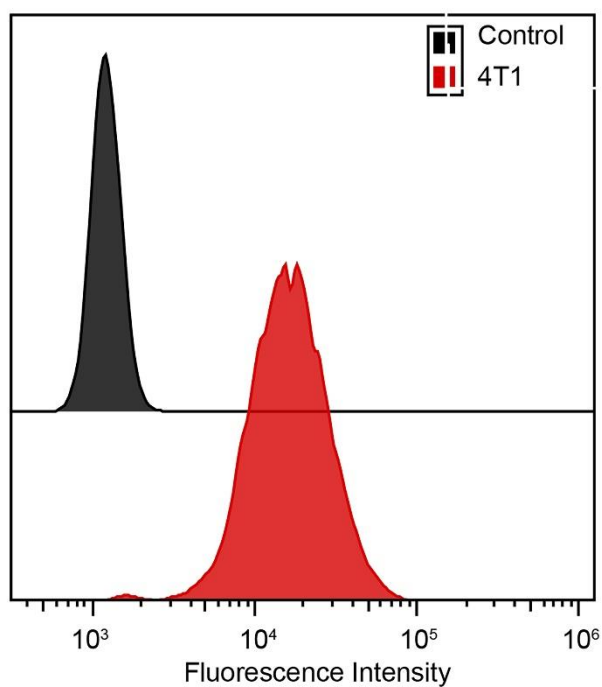

**Supplemental Figure S13.** Flow cytometry analysis of the  $\alpha_v\beta_3$  expression in 4T1 cell lines.

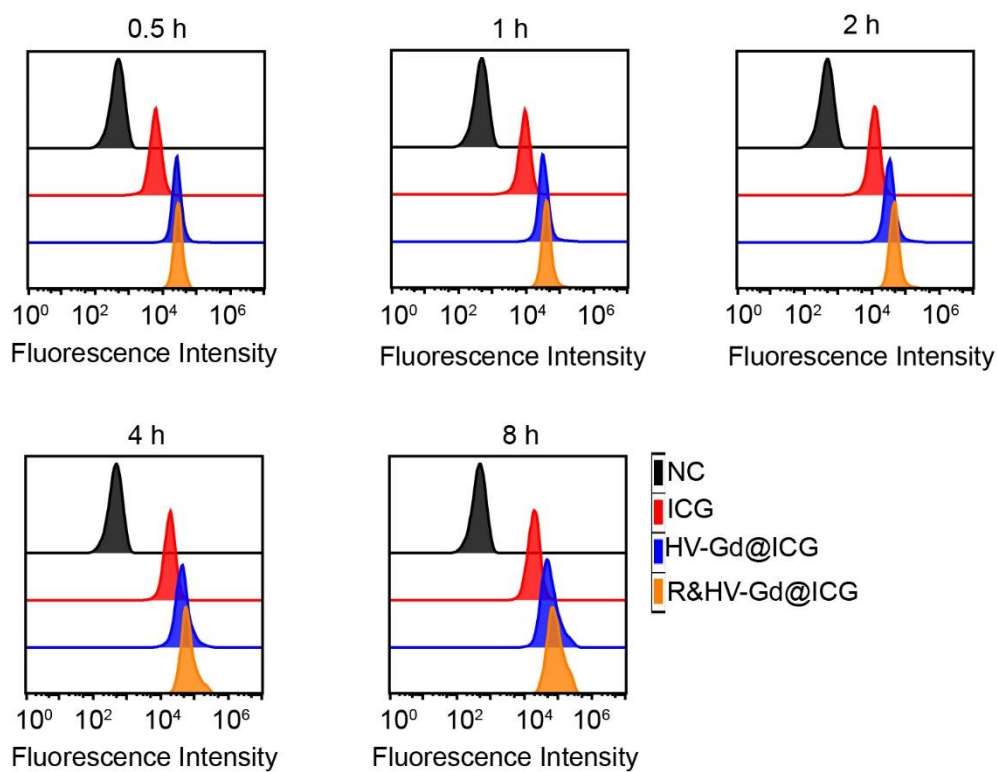

**Supplemental Figure S14.** Flow cytometry analysis of 4T1 cells incubated with PBS, ICG, R&HV-Gd, and R&HV-Gd@ICG for various periods of time.

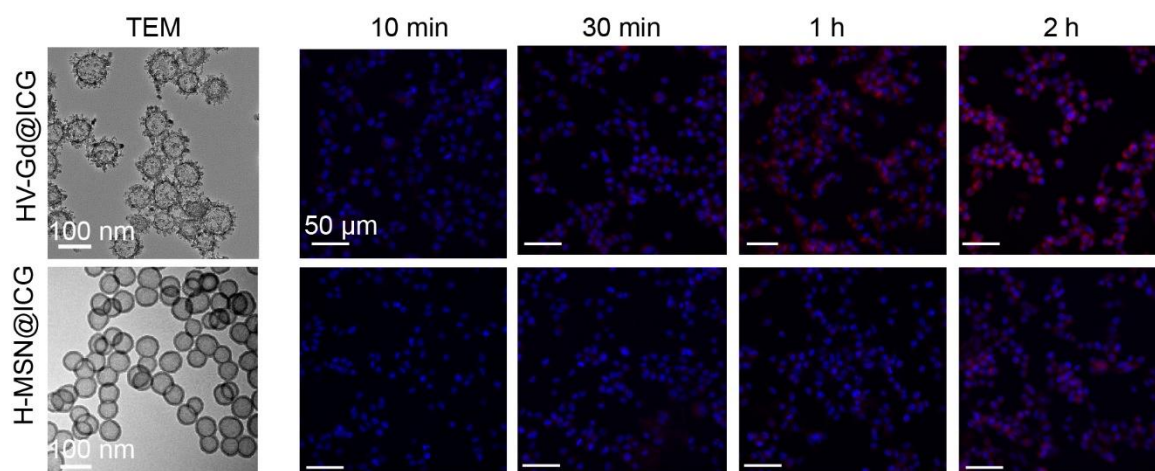

**Supplemental Figure S15.** The TEM images of HV-Gd@ICG and H-MSN@ICG (left); the fluorescence microscope images of 4T1 cells incubated with HV-Gd@ICG and H-MSN@ICG for various periods of time (right).

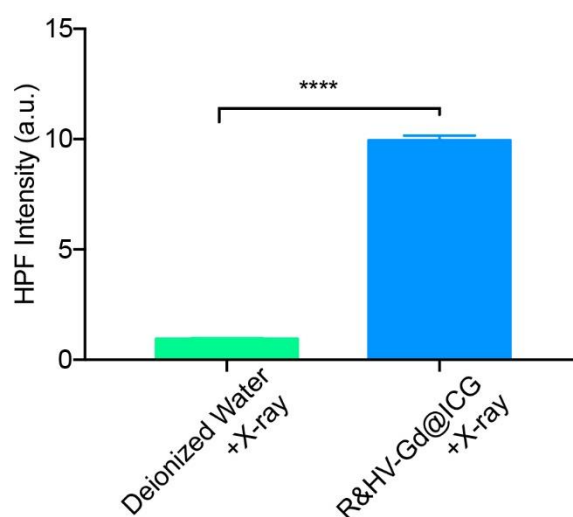

**Supplemental Figure S16.** The fluorescence intensity of HPF in the deionized water and R&HV-Gd@ICG solution with X-ray irradiation, respectively ( $n = 3$ , data were shown as means  $\pm$  SD, statistical significance is determined by two-tailed unpaired  $t$ -test, \*\*\*\* $p < 0.0001$ ).

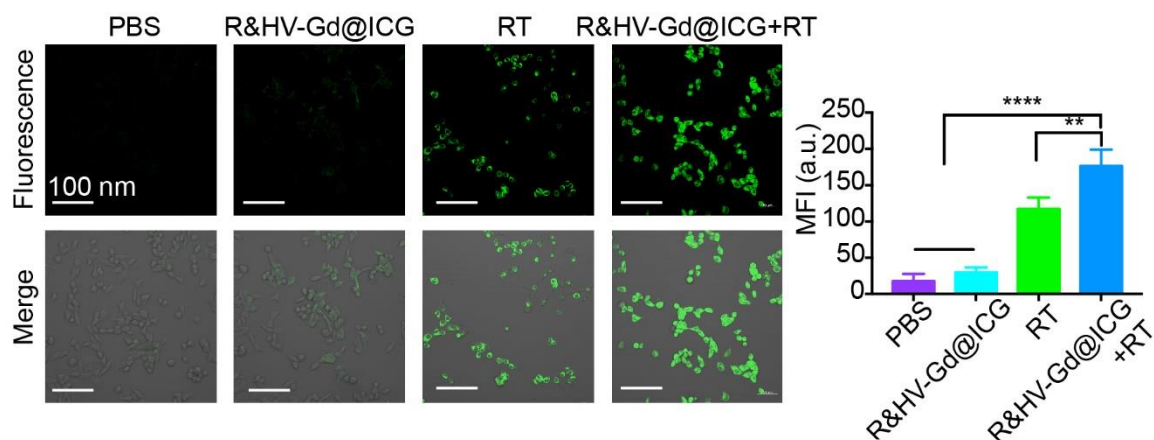

**Supplemental Figure S17.** Confocal laser scanning microscope images of intracellular  $\bullet\text{OH}$  stained by HPF staining in 4T1 cells treated with PBS, R&HV-Gd@ICG with or without X-ray (8 Gy)(left), and quantitative analysis of intracellular HPF fluorescence intensity (right) ( $n = 3$ , data were shown as means  $\pm$  SD, statistical significance is assessed using one-way ANOVA followed by Tukey's multiple comparisons test,  $**p < 0.01$ ,  $****p < 0.0001$ ).

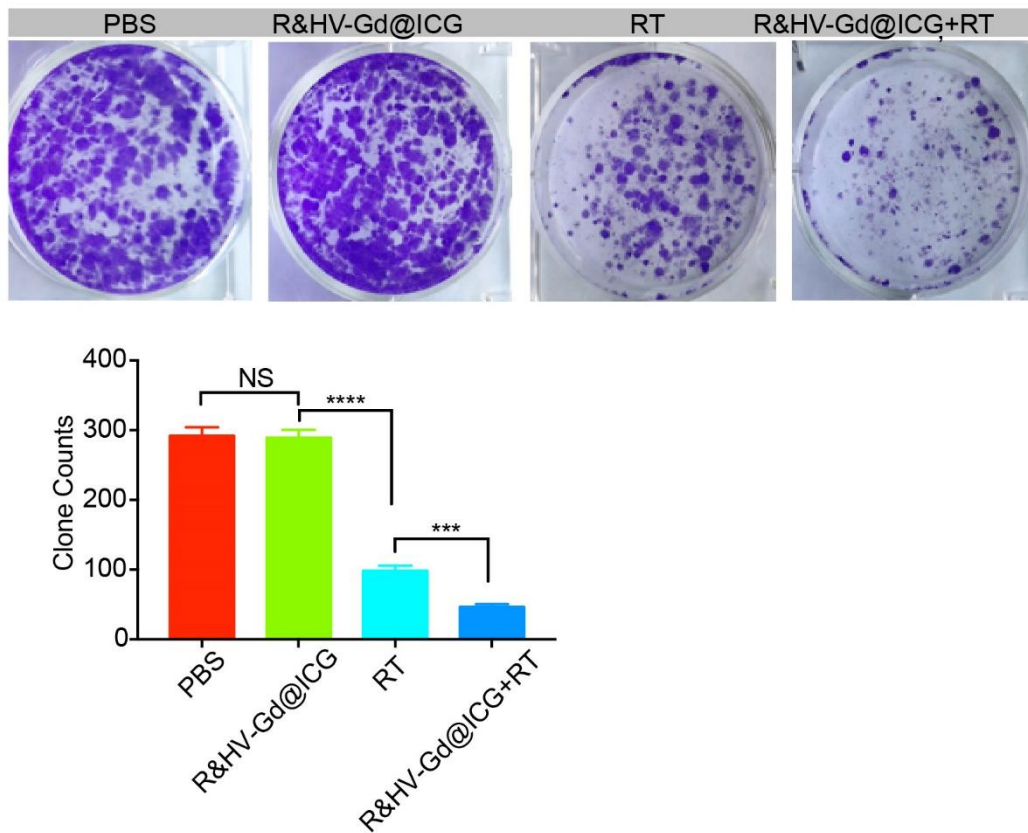

**Supplemental Figure S18.** Colony of 4T1 cells treated with PBS, R&HV-Gd@ICG, RT and R&HV-Gd@ICG + RT (upper), and quantification of clone counts (lower) ( $n = 3$ , data were shown as means  $\pm$  SD, statistical significance is assessed using one-way ANOVA followed by Tukey's multiple comparisons test, \*\*\* $p < 0.001$ , \*\*\*\* $p < 0.0001$ ).

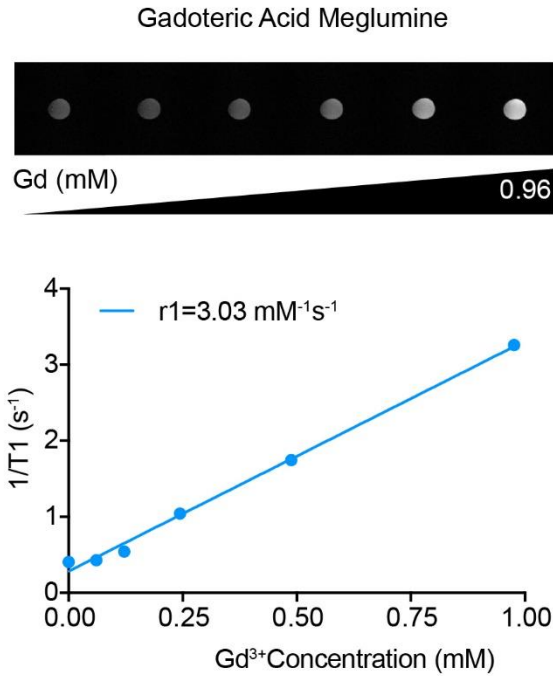

**Supplemental Figure S19.** T1-weighted MR images (upper) and the longitudinal relaxivities (r1) values (lower) of the Gadoteric Acid Meglumine recorded using 1.5 T MR scanner.

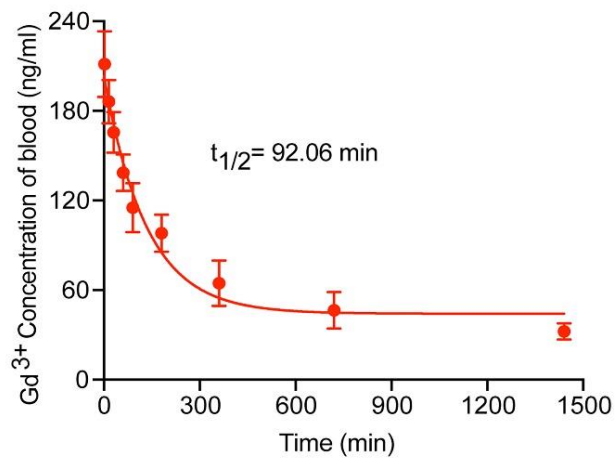

**Supplemental Figure S20.** Blood concentration versus time curve of R&HV-Gd@ICG nanoprobe in the mice ( $n = 3$ ).



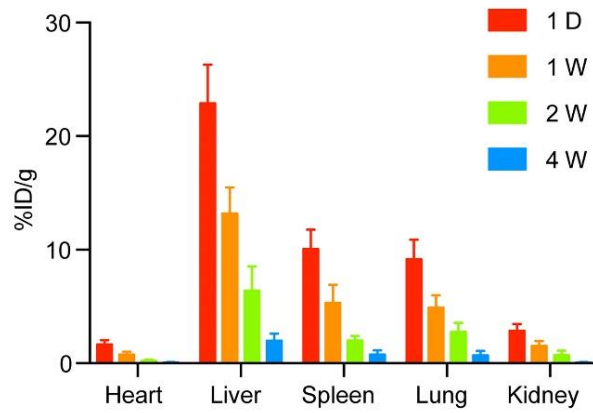

**Supplemental Figure S21.** Time-dependent biodistribution profile of different organs after intravenous injection R&HV-Gd@ICG nanoprobe for different periods ( $n = 3$ , data were shown as means  $\pm$  SD).

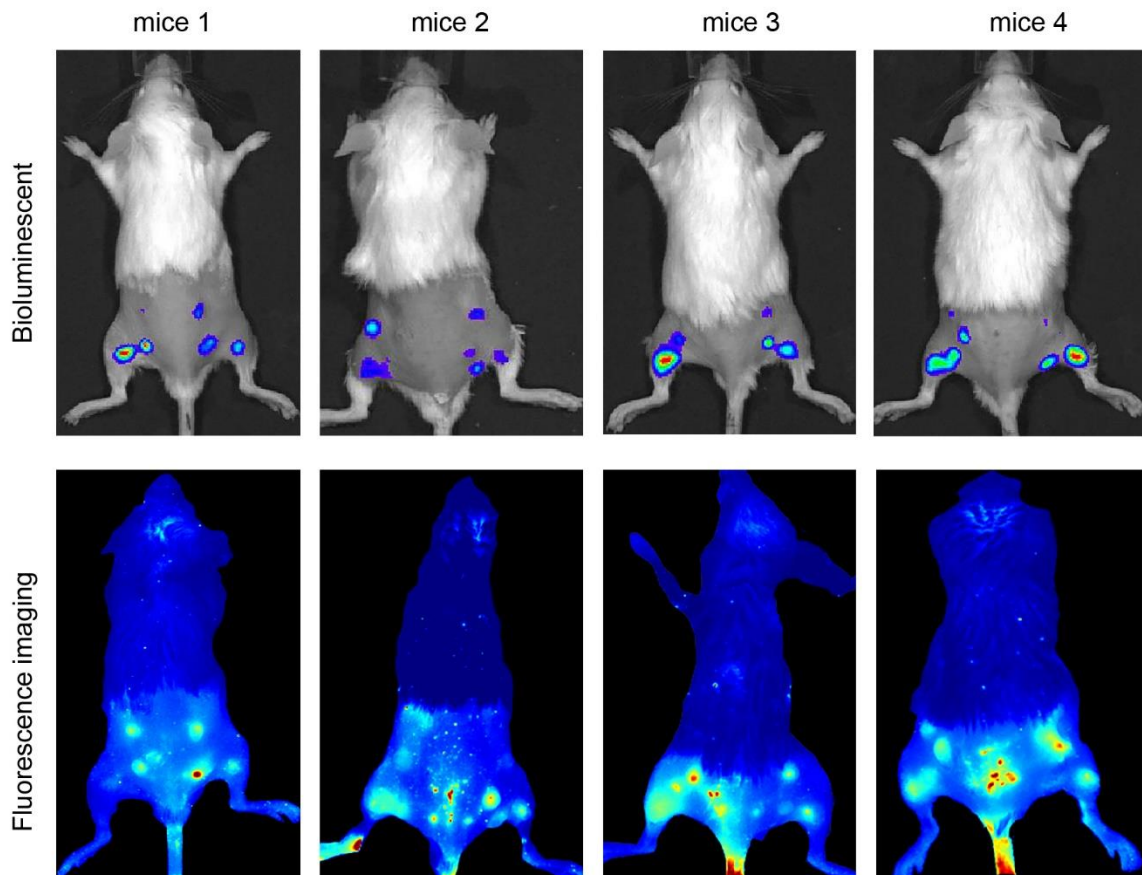

**Supplemental Figure S22.** Preoperative bioluminescent and fluorescent images of the

multiple micro-tumor bearing mice after 48 h injection of the R&HV-Gd@ICG nanoprobe.

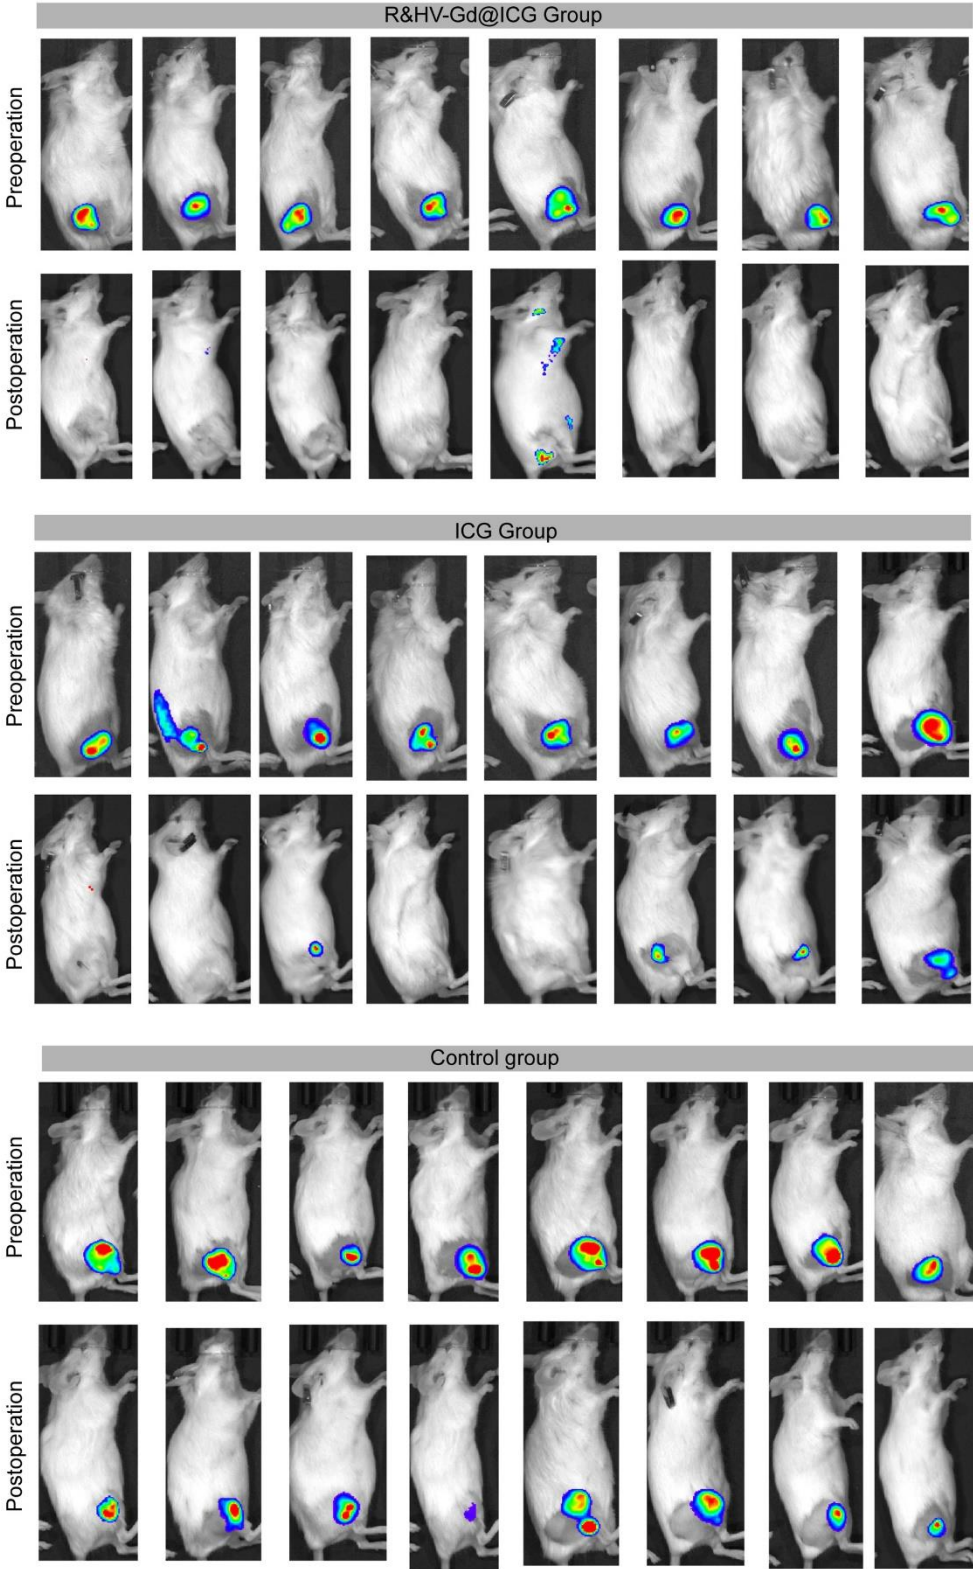

Supplemental Figure S23. Preoperative and postoperative bioluminescent images of the

4T1-tumor bearing mice under tumor resection surgery after injected R&HV-Gd@ICG and ICG.

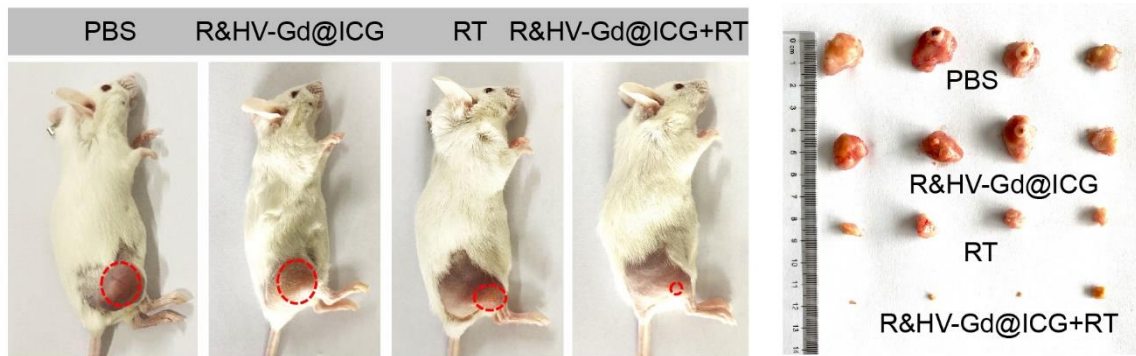

**Supplemental Figure S24.** Photographs of representative mouse (left) and tumors harvested from mice (right) ( $n = 4$ ) treated with PBS, R&HV-Gd@ICG, RT and R&HV-Gd@ICG+ RT.

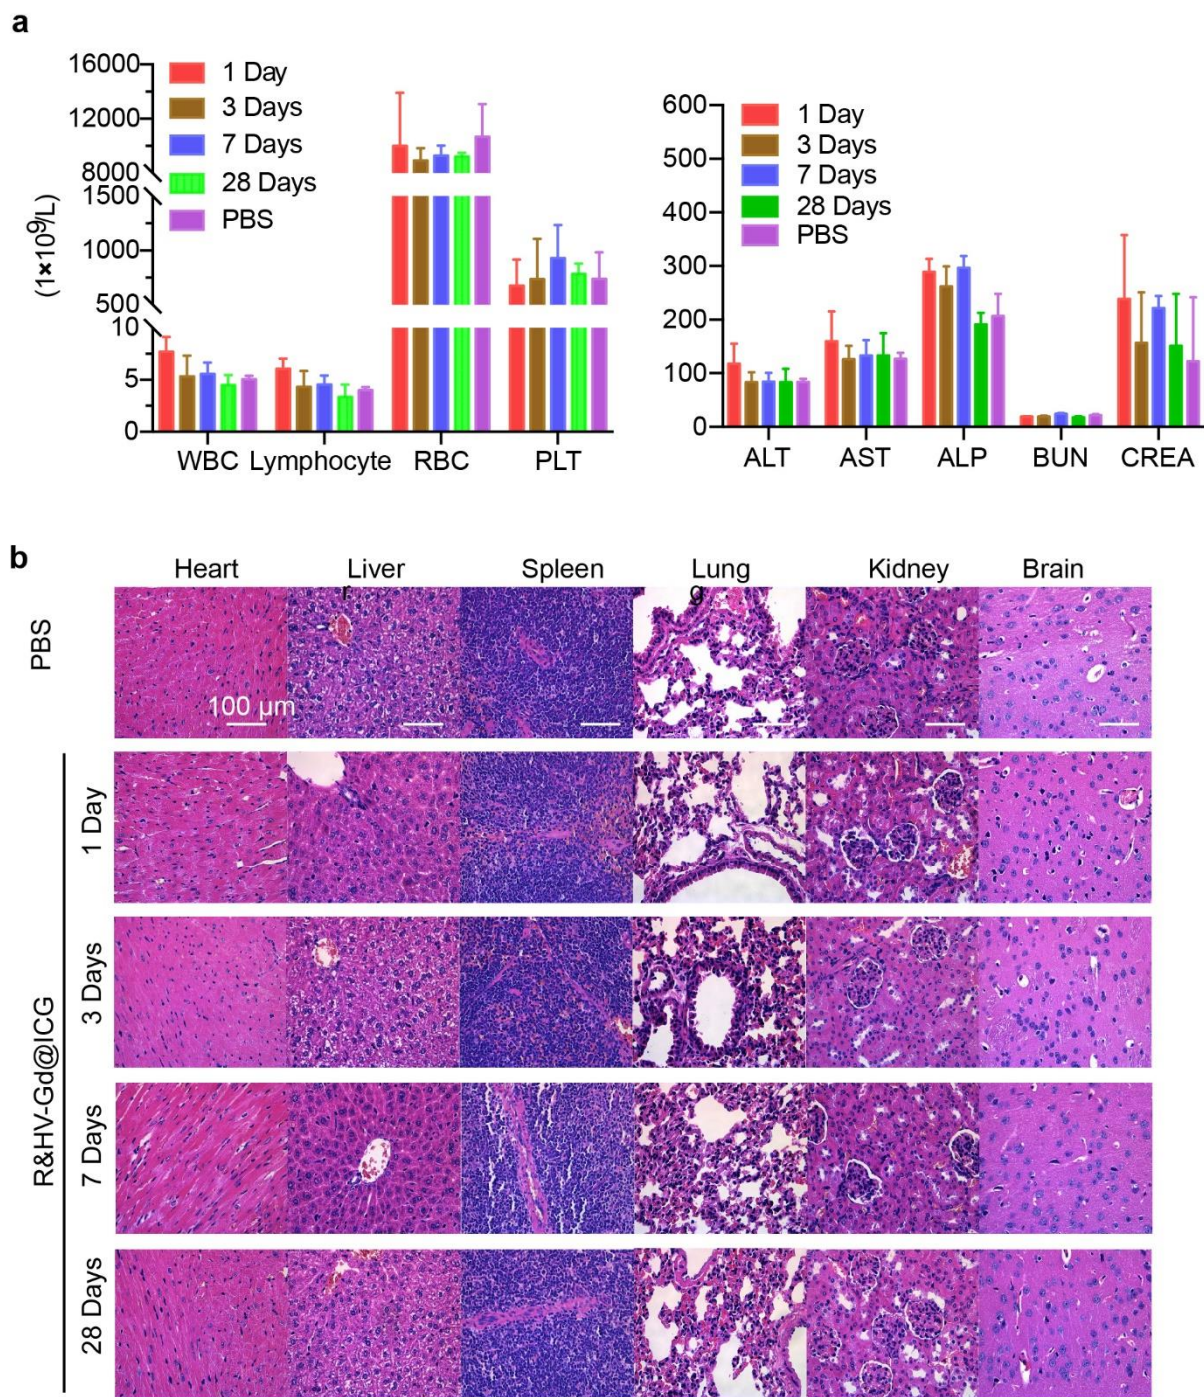

**Supplemental Figure S25.** Blood cytology, liver and kidney function indexes (a) H&E-stained images (b) of major organs from healthy control mice and mice after intravenous injection of R&HV-Gd@ICG nanoprobe at different time points ( $n = 3$ , data were shown as means  $\pm$  SD).

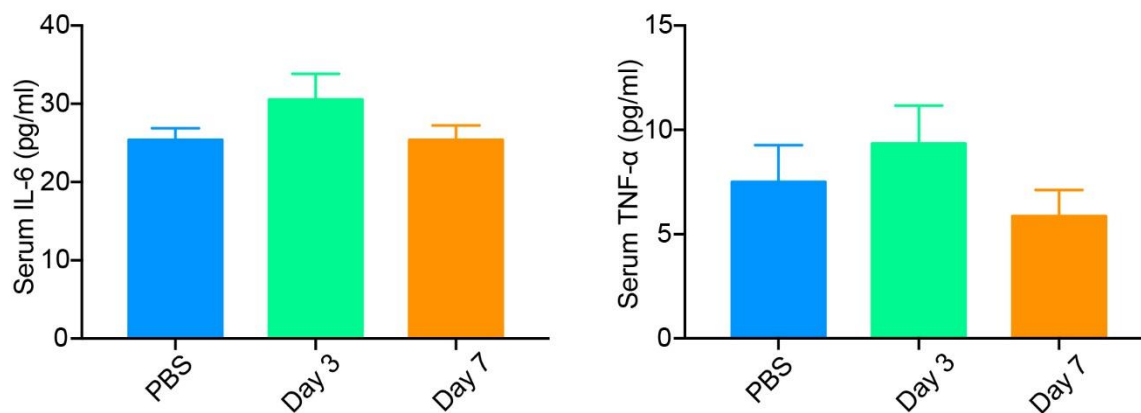

**Supplemental Figure S26.** The mice serum levels of IL- 6 and TNF-  $\alpha$  after treated with R&HV-Gd@ICG for different days, PBS treatment was set as a control ( $n = 3$ , data were shown as means  $\pm$  SD).
